# Supplementary material
Source: PubMed Central journal article supplement (PMC6112161)
Supplement: Supp_Figure1.pdf [file Supp_Figure1.pdf]

## Supplementary Data

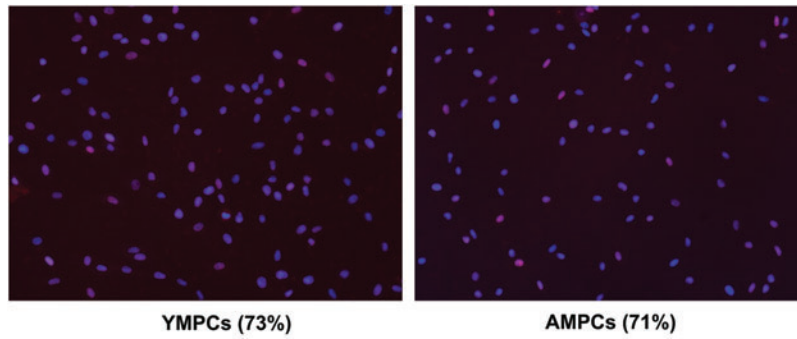

**SUPPLEMENTARY FIG. S1.** Pax7 labeling of YMPCs and AMPCs. MPCs were labeled with an antibody against Pax7 (*red*) and DAPI (nuclei-*blue*). Pax7<sup>+</sup> nuclei were counted as doubled labeled (*purple/pink*) nuclei using ImageJ software and quantitated using Prism. MPCs, muscle progenitor cells.
