# Supplementary material
Source: PubMed Central journal article supplement (PMC6112161)
Supplement: Supp_Figure2.pdf [file Supp_Figure2.pdf]

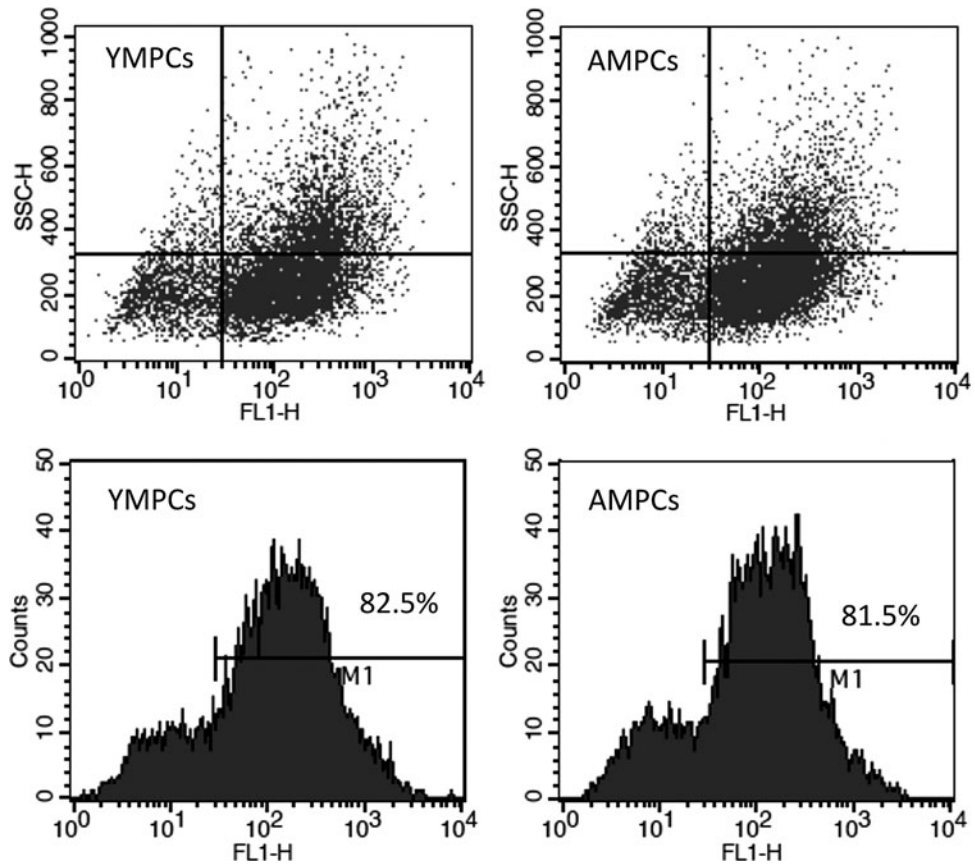

**SUPPLEMENTARY FIG. S2.** Lentivirus labeling efficiency of MPCs. Flow cytometry was used to determine the GFP-lentivirus labeling efficiency of MPCs isolated from young (YMPCs) and adult (AMPCs) limb muscles. Data are representative for all experiments performed.
