# Supplementary material
Source: PubMed Central journal article supplement (PMC6112161)
Supplement: Supp_Table1.pdf [file Supp_Table1.pdf]

SUPPLEMENTARY TABLE S1. AVERAGE BODY WEIGHT OF DIFFERENT-AGED RATS AND DIFFERENT TREATMENT GROUPS ( $\pm$ SEM)

|              |              | <b>Body Wt (g)-<br/>Day 0</b> | <b>Body Wt (g)-Day<br/>14</b> |
|--------------|--------------|-------------------------------|-------------------------------|
| <b>Young</b> | <b>PBS</b>   | 329.10 $\pm$ 7.00             | 351.14 $\pm$ 6.47             |
|              | <b>YMPCs</b> | 332.15 $\pm$ 3.56             | 354.84 $\pm$ 4.79             |
|              | <b>AMPCs</b> | 328.69 $\pm$ 4.06             | 345.48 $\pm$ 4.35             |
| <b>Adult</b> | <b>PBS</b>   | 573.37 $\pm$ 7.28             | 564.37 $\pm$ 7.33             |
|              | <b>YMPCs</b> | 590.27 $\pm$ 11.4             | 586.75 $\pm$ 13.1             |
|              | <b>AMPCs</b> | 583.31 $\pm$ 9.91             | 573.19 $\pm$ 9.68             |
| <b>Aged</b>  | <b>PBS</b>   | 613.50 $\pm$ 11.5             | 594.00 $\pm$ 16.0             |
|              | <b>YMPCs</b> | 622.75 $\pm$ 13.1             | 595.75 $\pm$ 13.6             |
|              | <b>AMPCs</b> | 706.75 $\pm$ 27.8             | 698.25 $\pm$ 23.7             |
