# Supplementary material
Source: PubMed Central journal article supplement (PMC6112161)
Supplement: Supp_Table2.pdf [file Supp_Table2.pdf]

SUPPLEMENTARY TABLE S2. AVERAGE TIBIALIS ANTERIOR WEIGHT (UNINJURED AND INJURED) OF DIFFERENT-AGED RATS AND DIFFERENT TREATMENT GROUPS ( $\pm$ SEM)

|              |              | Uninjured TA (g) | Injured TA (g)   |
|--------------|--------------|------------------|------------------|
| <b>Young</b> | <b>PBS</b>   | 0.580 $\pm$ 0.01 | 0.529 $\pm$ 0.01 |
|              | <b>YMPCs</b> | 0.589 $\pm$ 0.01 | 0.533 $\pm$ 0.02 |
|              | <b>AMPCs</b> | 0.581 $\pm$ 0.01 | 0.549 $\pm$ 0.02 |
| <b>Adult</b> | <b>PBS</b>   | 0.830 $\pm$ 0.02 | 0.593 $\pm$ 0.02 |
|              | <b>YMPCs</b> | 0.873 $\pm$ 0.03 | 0.742 $\pm$ 0.04 |
|              | <b>AMPCs</b> | 0.819 $\pm$ 0.02 | 0.380 $\pm$ 0.04 |
| <b>Aged</b>  | <b>PBS</b>   | 0.766 $\pm$ 0.01 | 0.557 $\pm$ 0.02 |
|              | <b>YMPCs</b> | 0.791 $\pm$ 0.02 | 0.591 $\pm$ 0.03 |
|              | <b>AMPCs</b> | 0.854 $\pm$ 0.03 | 0.658 $\pm$ 0.07 |
